# Supplementary material for: Effects of co-doping the SnO2 electron transport layer with boron and indium on the photovoltaic performance of planar perovskite solar cells
Source: Royal Society of Chemistry journal article supplement (doi:10.1039/d4se01125b), 2024-01-01
Supplement: d4se01125b1.pdf [file d4se01125b1.pdf]

## Effects of co-doping SnO<sub>2</sub> electron transport layer with boron and indium on the photovoltaic performance of planar perovskite solar cells

*Pareena G. Wagle<sup>1, 2, 3</sup> ‡, M. Thambidurai<sup>1, 2</sup> ‡, Herlina Arianita Dewi<sup>2</sup>, Wang Xizu<sup>4</sup>, Nripan Mathews<sup>2, 5</sup>, Annalisa Bruno<sup>2, 5, 6</sup>, Hung D. Nguyen<sup>\*1, 2</sup>, Monica Katiyar<sup>\*3</sup> and Cuong Dang<sup>\*1, 2</sup>*

1. School of Electrical and Electronic Engineering, Nanyang Technological University, 50 Nanyang Avenue, 639798, Singapore.
2. Energy Research Institute @NTU (ERI@N), Research Techno Plaza, X-Frontier Block, Level 5, 50 Nanyang Drive, 637553, Singapore.
3. Department of Materials Science and Engineering, Indian Institute of Technology (IIT), Kanpur, 208016, India.
4. Institute of Materials Research and Engineering (IMRE), Agency for Science, Technology and Research (A\*STAR), 2 Fusionopolis Way, Innovis #08-03, 138634, Singapore.
5. School of Materials Science and Engineering, Nanyang Technological University, 50 Nanyang Avenue, 639798, Singapore.
6. School of Physical and Mathematical Sciences, Nanyang Technological University, 21 Nanyang Link, 637371, Singapore.

\*Email: [hungtd@ntu.edu.sg](mailto:hungtd@ntu.edu.sg); [mk@iitk.ac.in](mailto:mk@iitk.ac.in); [hcdang@ntu.edu.sg](mailto:hcdang@ntu.edu.sg)

‡ Pareena G. Wagle and M. Thambidurai contributed equally.

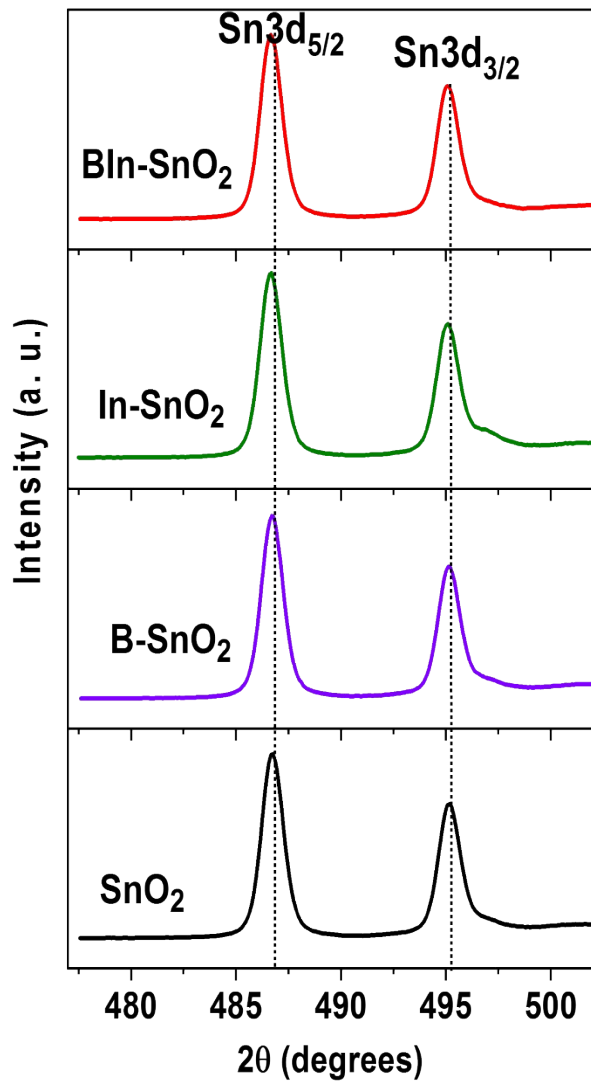

**Figure S1.** XPS spectra of SnO<sub>2</sub>, B-SnO<sub>2</sub>, In-SnO<sub>2</sub> and BIn-SnO<sub>2</sub> films at the peaks of Sn<sub>3d</sub>.

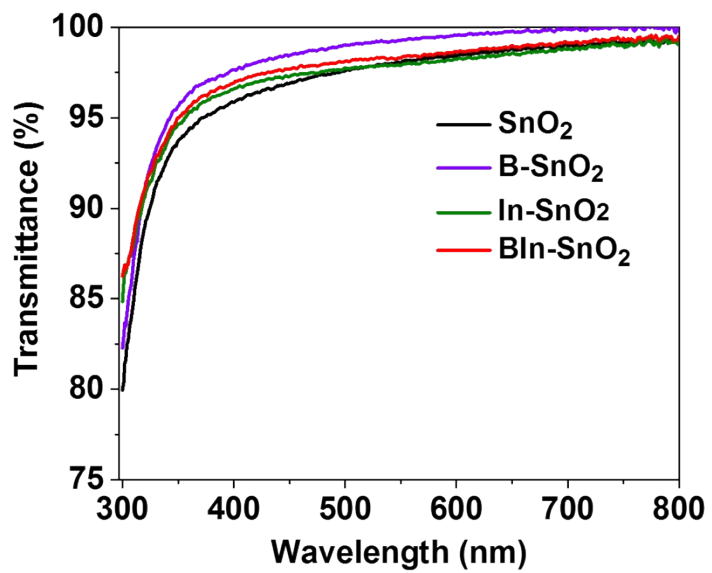

**Figure S2.** Transmittance spectra of SnO<sub>2</sub>, B-SnO<sub>2</sub>, In-SnO<sub>2</sub> and BIn-SnO<sub>2</sub> films.

Ultraviolet photoelectron spectroscopy (UPS) was used to analyze the energy-level of TiO<sub>2</sub>, as illustrated in Figure S3. The energy levels of the valence band maximum (VBM) and conduction band minimum (CBM) energy level of TiO<sub>2</sub> film were calculated to be  $-7.12$  and  $-3.92$  eV, respectively.

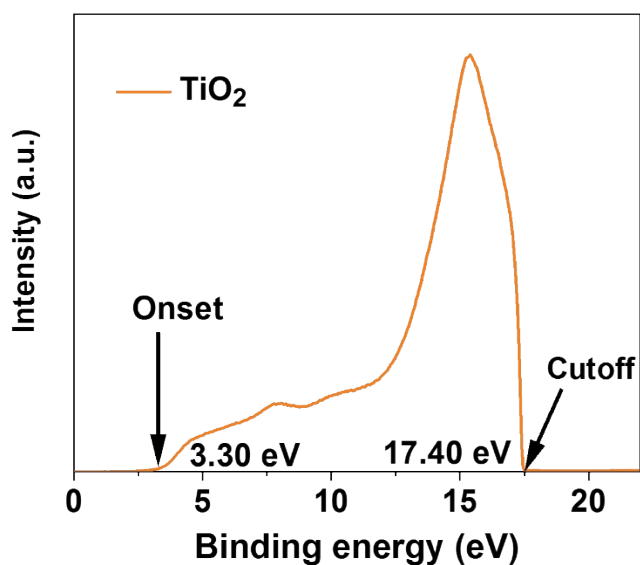

**Figure S3.** Ultraviolet photoelectron spectroscopy (UPS) spectra of TiO<sub>2</sub> film

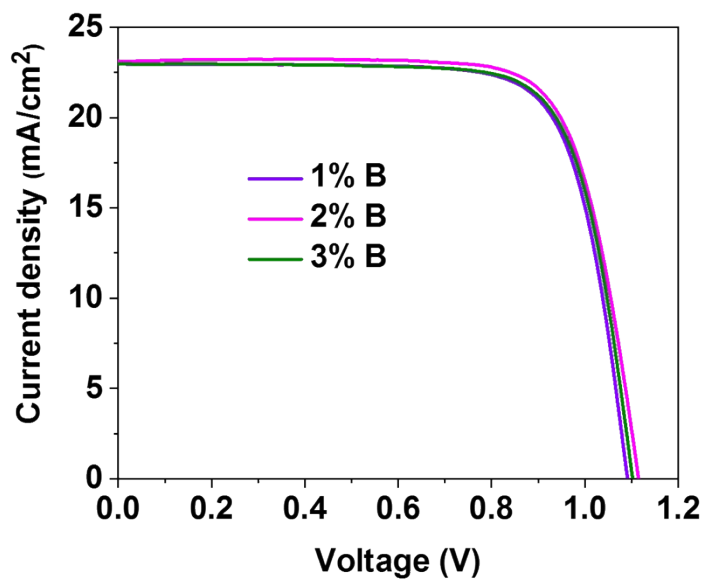

**Figure S4.** J-V curve of B-SnO<sub>2</sub> based PSCs.

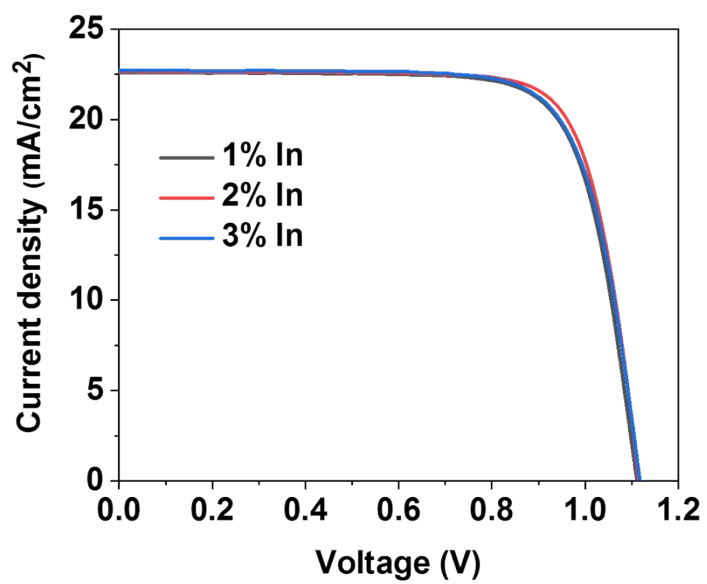

**Figure S5.** J-V curve of In-SnO<sub>2</sub> based PSCs.

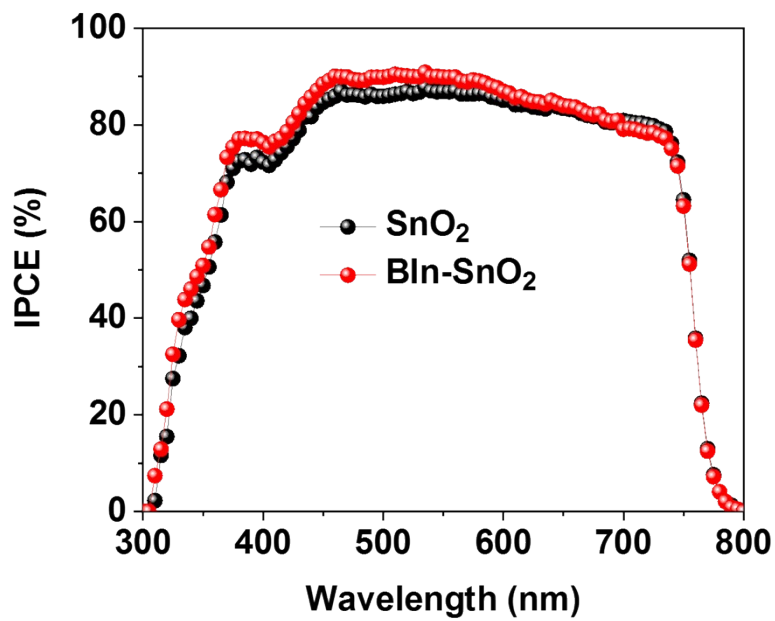

**Figure S6.** IPCE spectra of SnO<sub>2</sub> and BIn-SnO<sub>2</sub> based PSCs.

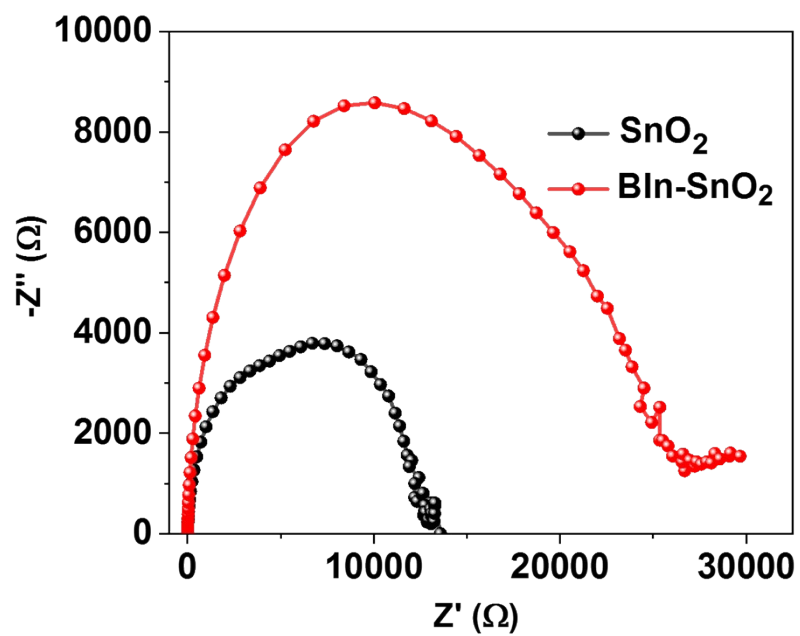

**Figure S7.** Nyquist plots of SnO<sub>2</sub> and BIn-SnO<sub>2</sub> ETL based perovskite devices.



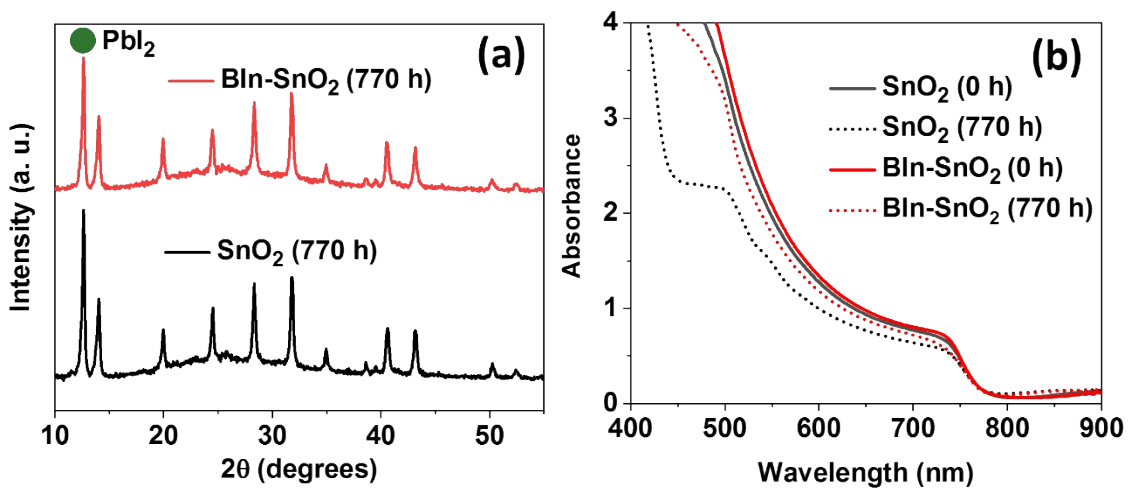

Figure S8. (a) XRD patterns and (b) UV-Vis absorption spectra of perovskite films on SnO<sub>2</sub> and BIn-SnO<sub>2</sub> substrates after 770 hours of storage under ambient conditions (40% RH, 25°C).

**Table S1:** Photovoltaic parameters of perovskite solar cells with various B concentration.

| Devices                 | $V_{oc}$<br>[V] | $J_{sc}$<br>[mA cm <sup>-2</sup> ] | FF<br>[%] | PCE<br>[%] |
|-------------------------|-----------------|------------------------------------|-----------|------------|
| 1 % B-Sn O <sub>2</sub> | 1.09            | 22.95                              | 75.56     | 18.93      |
| 2 % B-Sn O <sub>2</sub> | 1.11            | 23.10                              | 75.54     | 19.44      |
| 3 % B-Sn O <sub>2</sub> | 1.10            | 22.96                              | 75.45     | 19.09      |

**Table S2:** Photovoltaic parameters of perovskite solar cells with various In concentration.

| Devices                  | $V_{oc}$<br>[V] | $J_{sc}$<br>[mA cm <sup>-2</sup> ] | FF<br>[%] | PCE<br>[%] |
|--------------------------|-----------------|------------------------------------|-----------|------------|
| 1 % In-Sn O <sub>2</sub> | 1.11            | 22.59                              | 75.77     | 19.03      |
| 2 % In-Sn O <sub>2</sub> | 1.11            | 22.66                              | 77.57     | 19.56      |
| 3 % In-Sn O <sub>2</sub> | 1.11            | 22.72                              | 75.47     | 19.17      |
